# Supplementary material for: Bloom syndrome protein restrains innate immune sensing of micronuclei by cGAS
Source: PubMed Central journal article supplement — J Exp Med. 2019 Apr 1;216(5):1199–213. doi: 10.1084/jem.20181329 (PMC6504208; doi:10.1084/jem.20181329), 2019-04-01
Supplement: JEM_20181329_sm.pdf [file JEM_20181329_sm.pdf]

## Supplemental material

Gratia et al., <https://doi.org/10.1084/jem.20181329>

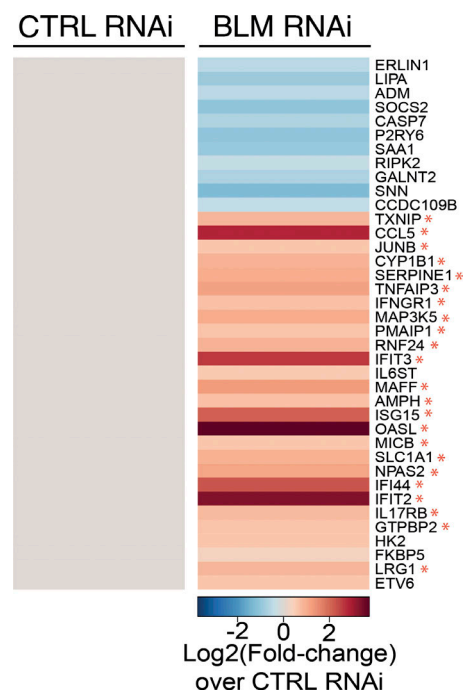

Figure S1. **BLM RNAi in HeLa cells induces an ISG signature.** Heatmaps representing the  $\log_2$  fold-change of the normalized expression values of 38 differentially expressed genes between control (CTRL RNAi) and BLM-depleted (BLM RNAi) HeLa cells. ISGs previously recognized in another study (Schoggins et al., 2011) are highlighted by red asterisks.

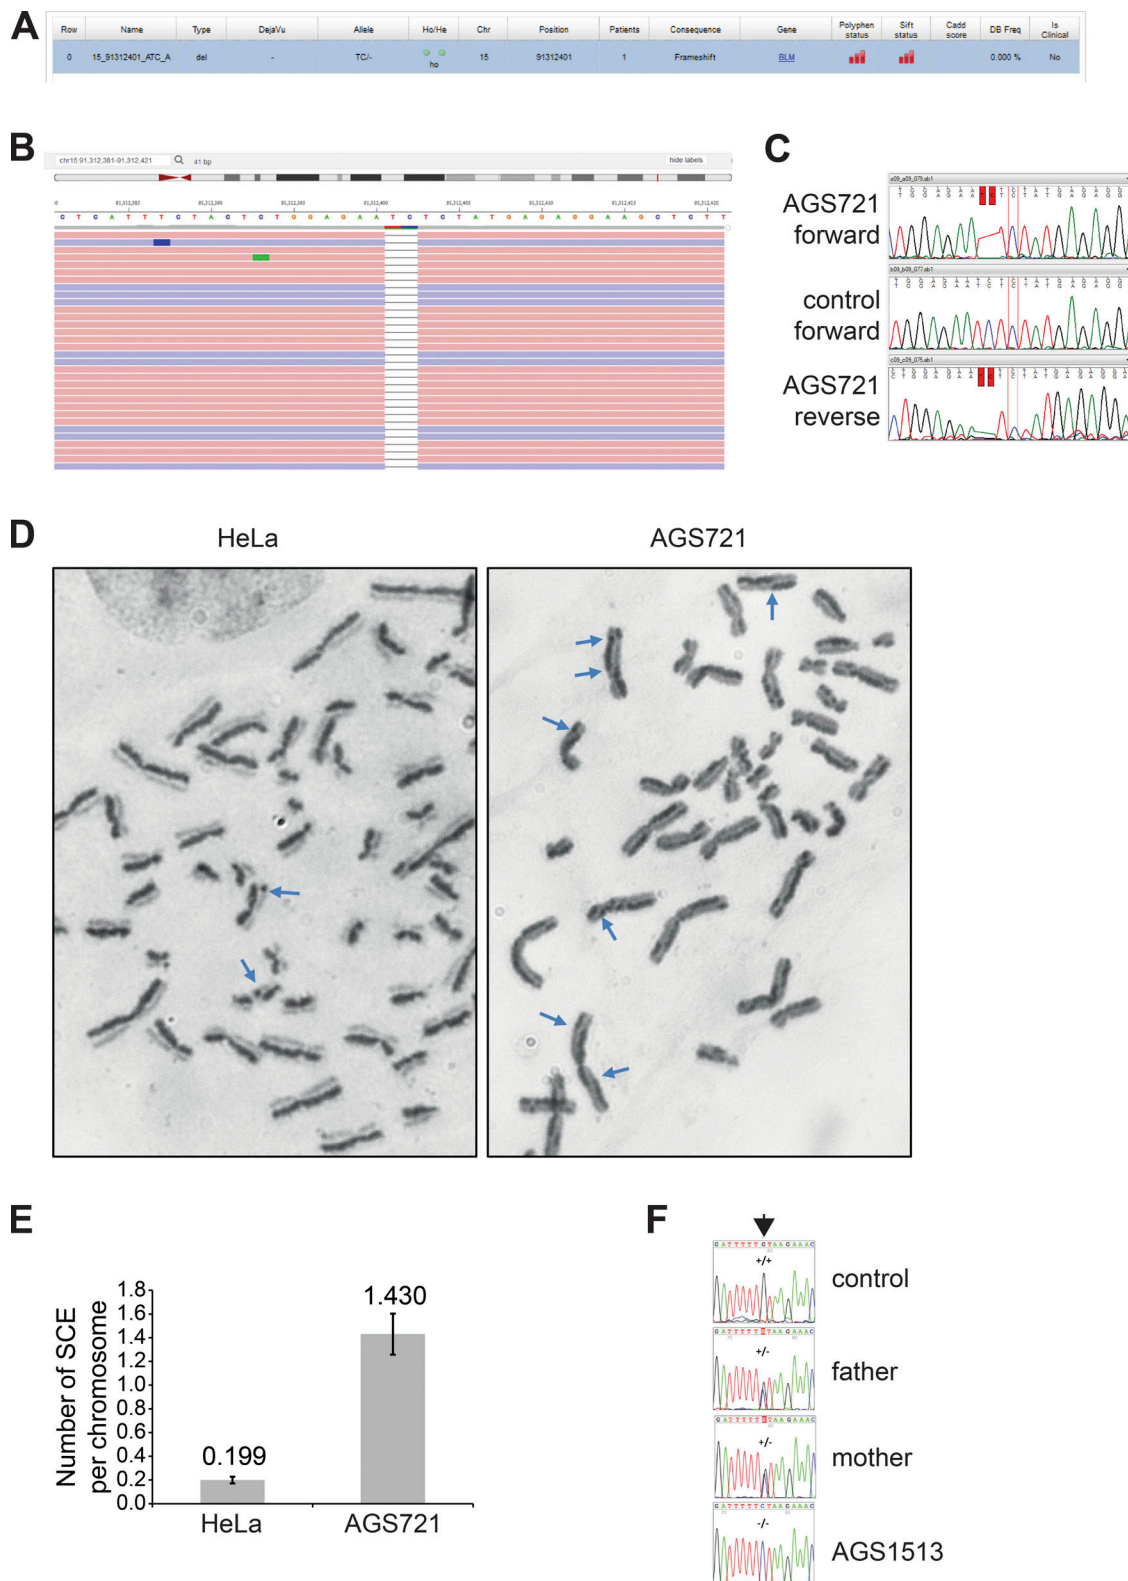

Figure S2. **BLM mutations in patients AGS721 and AGS1513.** (A) Whole-exome sequencing–based identification of the AGS721 homozygous mutation; screen capture from the results window of the Polyweb software (<http://www.polyweb.fr>) using the following criteria: frequency in public databases <0.001%; recessive; coding. (B) Screen capture of the AGS721 mutation coverage using IGV software. (C) Electropherogram of *BLM* cDNA from peripheral blood mononuclear cells of AGS721, illustrating the homozygous deletion of two nucleotides. (D) SCE frequency in HeLa cells and SV40-immortalized AGS721 cells; representative images; examples of exchanges are indicated with arrows. (E) Quantification of SCE frequency in HeLa cells (adapted from [Lahkim Bennani-Belhaj et al., 2010](#)) and AGS721 cells ( $n = 338$  chromosomes analyzed; mean with SD). (F) Electropherogram of *BLM* cDNA of AGS1513, parents, and unrelated control.

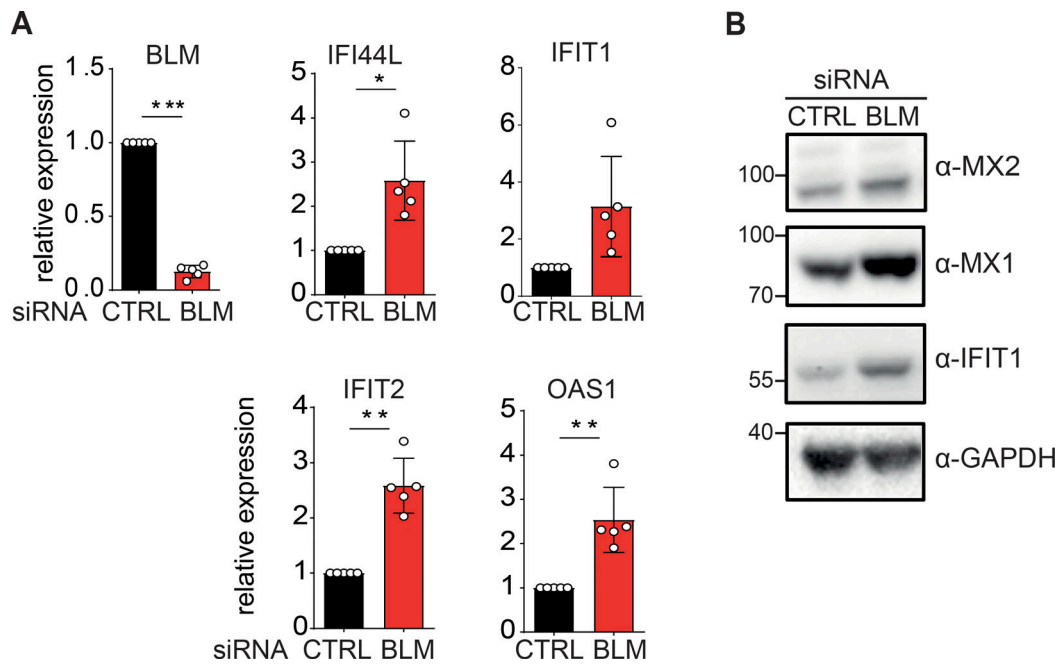

Figure S3. **BLM depletion induces ISGs in an independent source of primary human fibroblasts.** (A) mRNA level expression of *BLM*, *IFI44L*, *IFIT1*, *IFIT2*, and *OAS1* determined by RT-qPCR in an independent source of primary human fibroblasts treated with control (CTRL) or BLM siRNA for 72 h (mean with SD of  $n = 5$  independent experiments; one-sample t test, \* $P < 0.05$ , \*\* $P < 0.01$ , \*\*\* $P < 0.001$ ). (B) Protein levels of *MX2*, *MX1*, *IFIT1*, and *GAPDH* in cells, as in Fig. S2 A (representative of  $n = 5$  independent experiments).

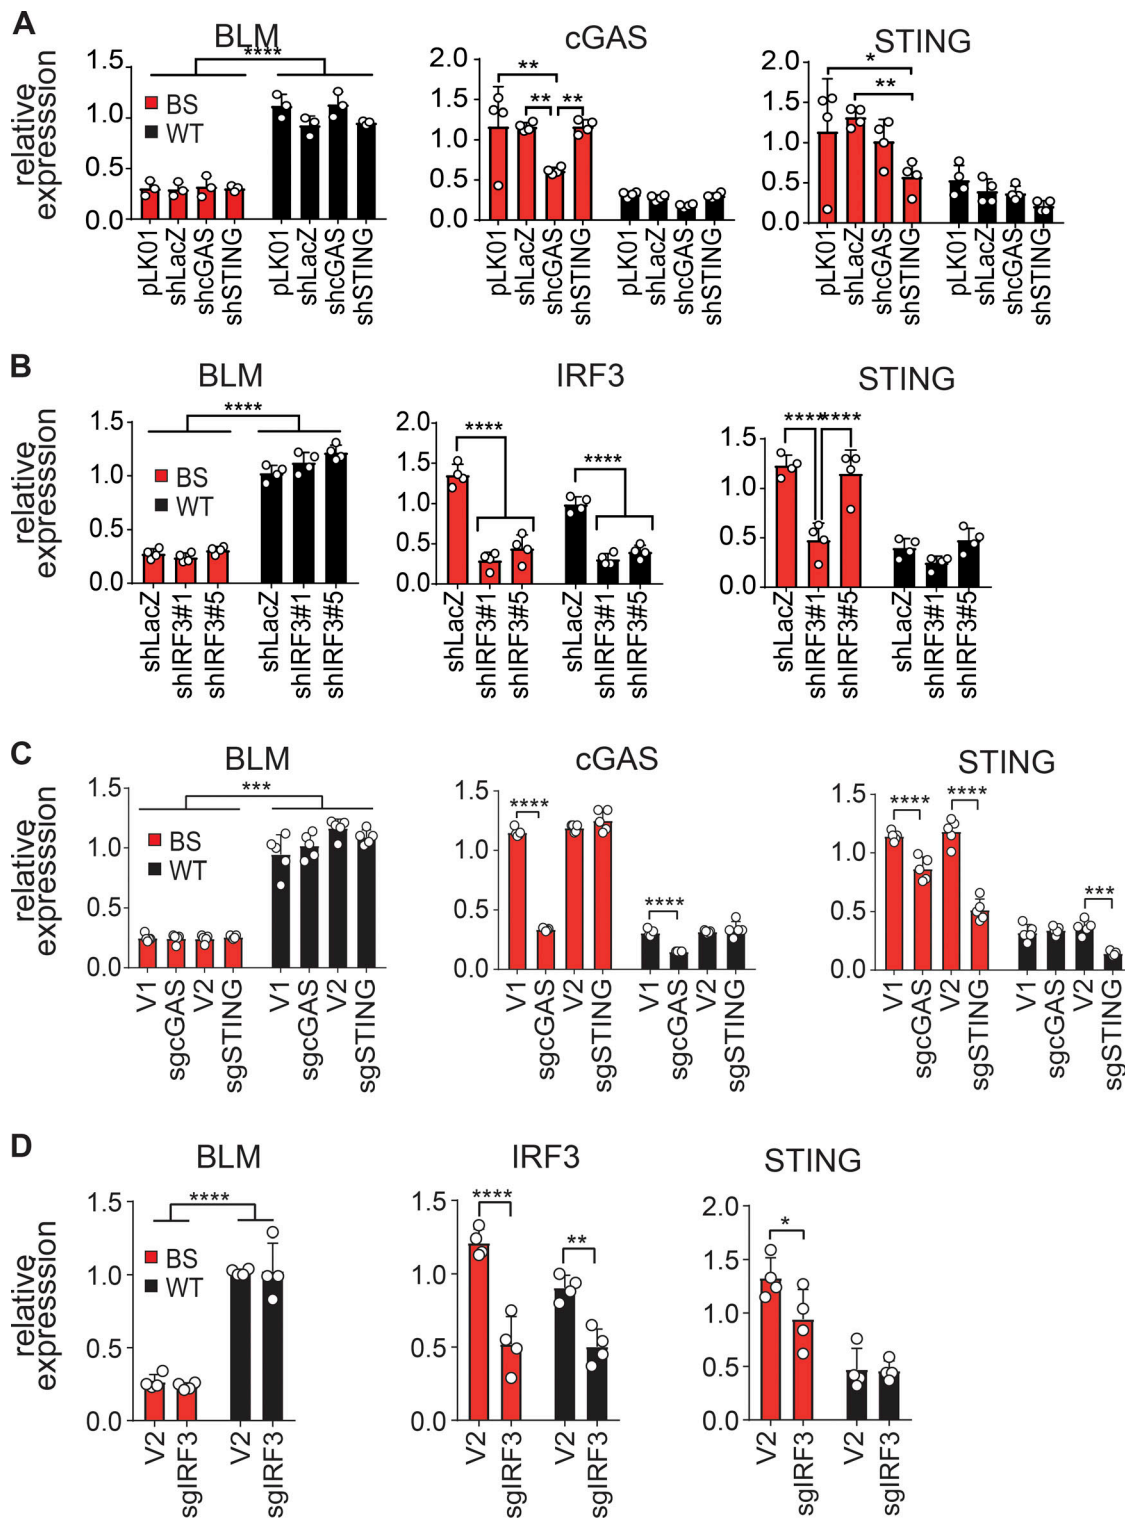

Figure S4. **ISG signature induction in BS cells requires the cGAS-STING-IRF3 pathway.** (A) mRNA level expression of *BLM*, *cGAS*, and *STING* in cells, as in Fig. 3 A (mean with SD of  $n = 4$  independent experiments; two-way ANOVA with Tukey post-test, \* $P < 0.05$ , \*\* $P < 0.01$ , \*\*\*\* $P < 0.0001$ ). (B) mRNA level expression of *BLM*, *IRF3*, and *STING* in cells, as in Fig. 3 A (mean with SD of  $n = 4$  independent experiments; two-way ANOVA with Tukey post-test, \*\*\*\* $P < 0.0001$ ). (C) mRNA level expression of *BLM*, *cGAS*, and *STING* in cells, as in Fig. 3 D (mean with SD of  $n = 5$  independent experiments; two-way ANOVA with Tukey post-test, \*\*\* $P < 0.001$ , \*\*\*\* $P < 0.0001$ ). (D) mRNA level expression of *BLM*, *IRF3*, and *STING* cells, as in Fig. 3 D (mean with SD of  $n = 4$  independent experiments; two-way ANOVA with Sidak post-test, \* $P < 0.05$ , \*\* $P < 0.01$ , \*\*\*\* $P < 0.0001$ ).

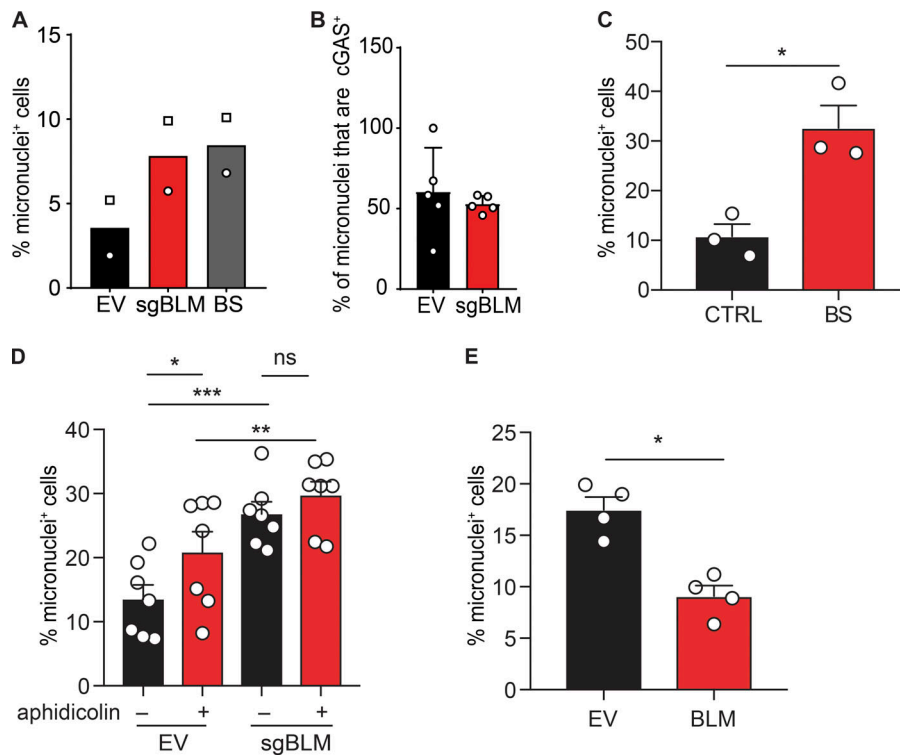

Figure S5. **BLM deficiency increases the frequency of micronuclei positive for cGAS.** (A) Frequency of cells positive for at least one micronucleus in SV40-immortalized control (EV) or *BLM*-knockout (sgBLM) fibroblasts and BS fibroblasts. Data are the combination of two independent experiments. (B) Percentage of micronuclei that are GFP-cGAS positive in cells, as in Fig. 5 A (mean with SD of  $n = 5$  combined independent experiments). (C) Frequency of cells positive for at least one micronucleus in primary control (CTRL) or *BLM*-deficient fibroblasts (BS; mean with SEM of  $n = 3$  combined independent experiments; paired  $t$  test,  $*P < 0.05$ ). (D) Frequency of cells positive for at least one micronucleus in SV40-immortalized control (EV) or *BLM*-knockout fibroblasts (sgBLM) and treated by aphidicolin (mean with SEM of  $n = 7$  combined independent experiment, treatment with 12 or 30  $\mu\text{M}$  in four and three experiments respectively; repeated measures one-way ANOVA with a Sidak post-test,  $*P < 0.05$ ,  $**P < 0.01$ ,  $***P < 0.01$ ). (E) Frequency of cells positive for at least one micronucleus in SV40-immortalized control BS cells or *BLM*-transduced BS fibroblasts, as in Fig. 1 D (mean with SEM of  $n = 4$  combined independent experiments; paired  $t$  test,  $*P < 0.05$ ).

Table S1. **Mutations and clinical features of patients in the study**

| <b>Patient</b> | <b>Mutation</b>                     | <b>Case history</b>                                                                                                                                                                                                                                                                                                                                                                                                                                                                                                                                                                                                                                                                                                                                                                                                                                                                                                                                                                                                                                                                                                                                                                                                                                                                                                                                                                                                                                                                                                                                                                                                                                                                                                                                 |
|----------------|-------------------------------------|-----------------------------------------------------------------------------------------------------------------------------------------------------------------------------------------------------------------------------------------------------------------------------------------------------------------------------------------------------------------------------------------------------------------------------------------------------------------------------------------------------------------------------------------------------------------------------------------------------------------------------------------------------------------------------------------------------------------------------------------------------------------------------------------------------------------------------------------------------------------------------------------------------------------------------------------------------------------------------------------------------------------------------------------------------------------------------------------------------------------------------------------------------------------------------------------------------------------------------------------------------------------------------------------------------------------------------------------------------------------------------------------------------------------------------------------------------------------------------------------------------------------------------------------------------------------------------------------------------------------------------------------------------------------------------------------------------------------------------------------------------|
| AGS721         | Homozygous c.2349_2350del/p.Tyr784* | <p>This male child was born to unrelated parents with no family history of neurological or immunological problems. The pregnancy was complicated by intrauterine growth retardation and he was delivered at 36 wk of gestation weighing 1 kg. There was poor feeding from the outset so that he required a nasogastric tube for 2 yr.</p> <p>The first year of life was complicated by mild global developmental delay, walking at 18 mo of age. His mobility was best around the age of 3 yr, but this was followed by progressive lower limb spasticity, pyramidal signs, and toe walking, so that he was diagnosed with a progressive spastic paraplegia. His upper limbs were less affected, although he showed mild problems with fine motor control. He experienced two episodes of pneumonia at age 18 mo and 3 yr. He continued to exhibit mild learning difficulties, with poor ongoing growth (height, weight, and head circumference less than the third centile). He had micrognathia and osteoporosis with evidence of vertebral crush fractures so that he required vitamin D supplementation and bisphosphonate therapy. Erythrocyte sedimentation rate was persistently raised (22–80 mm/h; normal, &lt;20), with low IgG and IgM, raised CSF neopterin (58 pmol/liter; normal, &lt;30) but normal lymphocyte subsets. Brain MRI showed mild nonspecific abnormal high signal in the white matter.</p> <p>At the age of 8 yr, he was started on intravenous immunoglobulin replacement at 0.4 g/kg, given four times weekly. His progressive spastic paraplegia plateaued from 10 yr of age, but he has experienced orthopedic complications with kyphoscoliosis, requiring femur osteotomy and adductor releases at age 12 yr.</p> |
| AGS1513        | Homozygous c.3164G>C/p.C1055S       | <p>This male was the first-born child to a nonconsanguineous couple of Portuguese origin. There was no family history of note. Intrauterine growth retardation recognized during the second trimester of pregnancy prompted fetal karyotyping, which was normal. He was delivered at 38 wk of gestation with a birth weight, height, and head circumference of 2,160 g, 43 cm, and 32 cm, respectively. A congenital nevus of the buttocks was surgically resected and identified as a dermal nevus with neuroid differentiation/features of a schwannoma on histology.</p> <p>Psychomotor development was considered as normal. However, at 20 mo of age, growth hormone therapy was introduced because of short stature (weight, height, and head circumference &lt; –3 SDs). Growth indices then improved, so that he had achieved a normal weight (–0.5 SD) and height (–1.5 SD) within 6 mo, while he remained microcephalic (–3.5 SDs). Examination at this age identified multiple hyperpigmented and hypopigmented skin patches and mild facial dysmorphism with triangular face and thin upper lip.</p> <p>At 5 yr of age, he exhibited erythematous lesions of the face and legs following sun exposure. A diagnosis of BS was made on exome sequencing and growth hormone therapy discontinued because of an increased cancer risk. At last examination, aged 8 yr, he weighed 27.6 kg (+0.5 SD), with a height of 118 cm (–1.5 SD). He has experienced frequent ear, nose, and throat infections and recurrent episodes of fever. IgM and IgG are low. He is of normal intellect and attends regular school.</p>                                                                                                                        |

MRI, magnetic resonance imaging.

Table S2. **Plasmids used in the study**

| Plasmid name                         | Description                                                | Sequence inserted                                                                         |
|--------------------------------------|------------------------------------------------------------|-------------------------------------------------------------------------------------------|
| pCMV-VSVG                            | VSVG envelope protein                                      | -                                                                                         |
| psPAX2                               | Viral protein for lenti production                         | -                                                                                         |
| pTRIP-CMV-Puro2A                     | EV for gene expression (puromycin resistant)               | -                                                                                         |
| pTRIP-CMV-Puro2A-BLM                 | Vector for BLM expression (puromycin resistant)            | BLM ORF                                                                                   |
| pTRIP-CMV-EGFP-FLAG-cGAS E225A-D227A | Vector for cGAS expression (Ntase mutant)                  | cGAS ORF mutation E225A-D227A                                                             |
| pLKO.1-puro                          | EV for shRNA silencing (puromycin resistant)               | -                                                                                         |
| pLKO.1-puro-shLACZ                   | Vector with shLacZ control (puromycin resistant)           | 5'-GCGATCGTAATCACCCGAGTG-3'<br>5'-CTCGAG-3'<br>5'-CACTCGGGTGATTACGATCGC-3'                |
| pLKO.1-puro-cGASsh4                  | Vector with shcGAS (puromycin resistant)                   | 5'-CAACTACGACTAAAGCCATTT-3'<br>5'-CTCGAG-3'<br>5'-AAATGGCTTTAGTCGTAGTTG-3'                |
| pLKO.1-puro-STING-sh5                | Vector with shSTING (puromycin resistant)                  | 5'-GCCCCGATTGCAACTTACAAT-3'<br>5'-CTCGAG-3'<br>5'-ATTGTAAGTTCGAATCCGGGC-3'                |
| pLKO.1-puro-irf3-shrna1              | Vector with shIRF3 #1 (puromycin resistant)                | 5'-CTGCCTGGATGGCCAGTCACAC-3'<br>5'-CTGTGAAGCCACAGATGGG-3'<br>5'-GTGTGACTGGCCATCCAGGCAG-3' |
| pLKO.1-puro-irf3-shrna5              | Vector with shIRF3 #2 (puromycin resistant)                | 5'-TACCCAGGAAGACATTCTGGAT-3'<br>5'-CTGTGAAGCCACAGATGGG-3'<br>5'-ATCCAGAATGTCTTCTGGGTA-3'  |
| pLCRISPR-CMV                         | EV for gene silencing by CRISPR (puromycin resistant)      | -                                                                                         |
| pLCRISPR-CMV-cGAS3                   | Vector for cGAS silencing by CRISPR (puromycin resistant)  | 5'-GGGATCCCGACTTCTGGCG-3'                                                                 |
| pLentiCRISPRv2                       | EV for gene silencing by CRISPR (puromycin resistant)      | -                                                                                         |
| pLentiCRISPRv2-STING_gRNA3           | Vector for STING silencing by CRISPR (puromycin resistant) | 5'-AGGTACCGGAGAGTGTGCTC-3'                                                                |
| pLentiCRISPRv2 sgIRF3#5              | Vector for IRF3 silencing by CRISPR (puromycin resistant)  | 5'-GAAGCGGCTGTTGGTGCCGG-3'                                                                |
| pLentiCRISPRv2 sgBLM10               | Vector for BLM silencing by CRISPR (puromycin resistant)   | 5'-GGAACGAACTGCTTCAGCAG-3'                                                                |
| pLentiCRISPRv2 Neo                   | EV for gene silencing by CRISPR (neomycin resistant)       | -                                                                                         |
| pLentiCRISPRv2 Neo sgTREX1           | Vector for TREX1 silencing by CRISPR (neomycin resistant)  | 5'-GAGAGCTGTCTACCACACG-3'                                                                 |

ORF, open reading frame.

Table S3. **siRNAs used in the study**

| Nontargeting siRNA pool   | siBLM pool                |
|---------------------------|---------------------------|
| 5'-UGGUUUACAUGUCGACUAA-3' | 5'-CUAAUCUGUGGAGGGUUA-3'  |
| 5'-UGGUUUACAUGUUGUGUGA-3' | 5'-GAUCAAUGCUGCACUGCUU-3' |
| 5'-UGGUUUACAUGUUUUCUGA-3' | 5'-GGAUGACUCAGAAUGGUUA-3' |
| 5'-UGGUUUACAUGUUUCCUA-3'  | 5'-GCAACUAGAACGUCACUCA-3' |

Table S4. Primers used in the study

|               | Forward                        | Reverse                       |
|---------------|--------------------------------|-------------------------------|
| <i>BLM</i>    | 5'-CTGATGCCGACTGGAGGTG-3'      | 5'-TGACAACAGTGACCCCAGGA-3'    |
| <i>Actin</i>  | 5'-CTGGAACGGTGAAGGTGACA-3'     | 5'-AAGGGACTTCTGTAAACAATGCA-3' |
| <i>HMBS</i>   | 5'-GGCAATGCGGCTGCAA-3'         | 5'-GGGTACCCACGCGAATCAC-3'     |
| <i>B2M</i>    | 5'-CGCTCCGTGGCCTTAGC-3'        | 5'-GAGTACGCTGGATAGCCTCCA-3'   |
| <i>HPRT</i>   | 5'-GACCAGTCAACAGGGGACAT-3'     | 5'-AACACTTCTGGGGTCTTTTCAC-3'  |
| <i>cGAS</i>   | 5'-TCACGTATGTACCCAGAACC-3'     | 5'-CGCAGTTATCAAAGCAGAGGC-3'   |
| <i>STING</i>  | 5'-TCAAGGATCGGGTTACAGC-3'      | 5'-TGGCAAACAAGTCTGCAAG-3'     |
| <i>IRF3</i>   | 5'-CCCTTCATTGTAGATCTGATTACC-3' | 5'-TGCAGGTCCACAGTATTCTC-3'    |
| <i>MX1</i>    | 5'-GTTTCCGAAGTGGACATCGCA-3'    | 5'-CTGCACAGTTGTTCTCAGC-3'     |
| <i>OAS1</i>   | 5'-GAGCTCCAGGGCATACTAG-3'      | 5'-CCAAGCTCAAGAGCCTCATC-3'    |
| <i>IFIT1</i>  | 5'-CTCACATTTGCTTGGTTGTC-3'     | 5'-CAACCATGAGTACAAATGGTG-3'   |
| <i>IFIT2</i>  | 5'-AGGTCTCTTCAGCATTTATTGG-3'   | 5'-TATTGTTCTCACTCATGGTTGC-3'  |
| <i>IFI44L</i> | 5'-AACTGTGGTATAGCATATGTGG-3'   | 5'-CTCTCAATTGCACCAGTTTCC-3'   |
| <i>ISG20</i>  | 5'-GCTTGCCTTTCAGGAGCTG-3'      | 5'-ATCACCGATTACAGAACCCG-3'    |
| <i>CXCL10</i> | 5'-TGGCATTCAAGGAGTACCTC-3'     | 5'-TTGTAGCAATGATCTCAACACG-3'  |

Table S5. Antibodies used in the study

| Antibody                    | Manufacturer   | Description                                                           | Catalog number  | Antibody dilution |
|-----------------------------|----------------|-----------------------------------------------------------------------|-----------------|-------------------|
| <b>Primary antibodies</b>   |                |                                                                       |                 |                   |
| $\alpha$ -BLM               | Abcam          | Anti-BLM antibody (rabbit)                                            | ab2179          | 1/5,000           |
| $\alpha$ -Actin             | Sigma-Aldrich  | Anti-actin $\beta$ antibody (Rabbit)                                  | SAB5500001      | 1/10,000          |
| $\alpha$ -GAPDH             | Santa Cruz     | Anti-GAPDH antibody (Mousse)                                          | sc-32233        | 1/10,000          |
| $\alpha$ -cGAS              | Sigma-Aldrich  | Anti-MB21D1 antibody (rabbit, Prestige antibody)                      | HPA031700       | 1/1,000           |
|                             | Cell Signaling | cGAS (D1D3G) rabbit mAb                                               | #15102          | 1/1,000           |
| $\alpha$ -STING             | Cell Signaling | STING (D2P2F) rabbit mAb                                              | #13647          | 1/1,000           |
| $\alpha$ -IRF3              | IBL            | Anti-human IRF-3 (IFN regulatory factor-3) rabbit IgG Affinity Purify | 18781           | 1/1,000           |
| $\alpha$ -MX1               | Abcam          | Anti-MX1 antibody (rabbit)                                            | ab95926         | 1/1,000           |
| $\alpha$ -MX2               | Sigma-Aldrich  | Anti-MX2 antibody (rabbit)                                            | HPA030235-100UL | 1/1,000           |
| $\alpha$ -OAS1              | Sigma-Aldrich  | Anti-OAS1 antibody (rabbit, Prestige antibody)                        | HPA003657       | 1/1,000           |
| $\alpha$ -IFIT1             | Cell Signaling | IFIT1 antibody (rabbit)                                               | 12082S          | 1/1,000           |
| $\alpha$ -TREX1             | Abcam          | Anti-TREX1 antibody (rabbit)                                          | ab185228        | 1/1,000           |
| <b>Secondary antibodies</b> |                |                                                                       |                 |                   |
| $\alpha$ -Rabbit            | Santa Cruz     | Goat anti-rabbit HRP                                                  | sc-2054         | 1/5,000           |
| $\alpha$ -Rabbit            | Bethyl         | Goat anti-rabbit IgG-heavy and light chain                            | A120-201P       | 1/5,000           |
| $\alpha$ -Mouse             | Santa Cruz     | Goat anti-mouse HRP                                                   | sc-2055         | 1/5,000           |



Table S6. Number of primary nuclei analyzed in imaging experiments

| Refers to              | Experiment number | Conditions and number of nuclei |              |
|------------------------|-------------------|---------------------------------|--------------|
|                        |                   | EV                              | sgBLM        |
| Fig. 5 B               | 20171027          | 678                             | 453          |
|                        | 20171102          | 310                             | 222          |
|                        | 20171108          | 1,221                           | 752          |
|                        | 20171112          | 1,248                           | 1,222        |
|                        | 20180112          | 225                             | 556          |
|                        | 20171103          | 765                             | 448          |
|                        | 20180221          | 1,266                           | 547          |
| Fig. 5 C and Fig. S5 B |                   | <b>EV</b>                       | <b>BLM</b>   |
|                        | 20171102          | 310                             | 222          |
|                        | 20171108          | 1,221                           | 752          |
|                        | 20180112          | 225                             | 556          |
|                        | 20171103          | 765                             | 448          |
| Fig. 5 D and Fig. S5 C |                   | <b>CTRL</b>                     | <b>BLM</b>   |
|                        | 20181213          | 609                             | 653          |
|                        | 20181217          | 353                             | 539          |
|                        | 20181218.1        | 749                             | 890          |
| Fig. 5 E and Fig. S5 D |                   | <b>EV</b>                       | <b>sgBLM</b> |
|                        | 20181211          | UT: 1,413                       | 1,486        |
|                        |                   | APH: 846                        | 611          |
|                        | 20181213          | UT: 730                         | 772          |
|                        |                   | APH: 549                        | 622          |
|                        | 20181219          | UT: 1,288                       | 709          |
|                        |                   | APH: 700                        | 571          |
|                        | 20181221          | UT: 1,713                       | 693          |
|                        |                   | APH: 706                        | 526          |
|                        | 20190103          | UT: 1,475                       | 2,209        |
|                        |                   | APH: 1,226                      | 1157         |
|                        | 20190107          | UT: 716                         | 732          |
| APH: 630               |                   | 499                             |              |
| 20190110               | UT: 1,588         | 1,787                           |              |
|                        | APH: 990          | 506                             |              |
| Fig. 5 F and Fig. S5 E |                   | <b>EV</b>                       | <b>BLM</b>   |
|                        | 20181213          | 375                             | 554          |
|                        | 20181217          | 643                             | 674          |
|                        | 20181218.1        | 711                             | 550          |
|                        | 20181218.2        | 420                             | 675          |

APH, aphidicolin; sgBLM, single guide RNA against BLM; UT, untreated.

## References

- Lahkim Bennani-Belhaj, K., S. Rouzeau, G. Buhagiar-Labarchède, P. Chabosseau, R. Onclercq-Delic, E. Bayart, F. Cordelières, J. Couturier, and M. Amor-Guélet. 2010. The Bloom syndrome protein limits the lethality associated with RAD51 deficiency. *Mol. Cancer Res.* 8:385–394. <https://doi.org/10.1158/1541-7786.MCR-09-0534>
- Schoggins, J.W., S.J. Wilson, M. Panis, M.Y. Murphy, C.T. Jones, P. Bieniasz, and C.M. Rice. 2011. A diverse range of gene products are effectors of the type I interferon antiviral response. *Nature.* 472:481–485. <https://doi.org/10.1038/nature09907>
